# Supplementary material for: Cucurbiturils regulating Fe3O4–Au nanoparticles as a multi-functional platform for Cd2+ sensing and nitrocompound catalysis
Source: Royal Society of Chemistry journal article supplement (doi:10.1039/d0cc04131a), 2020-01-01
Supplement: d0cc04131a1.pdf [file d0cc04131a1.pdf]

## Supplementary Material

### **Cucurbiturils regulating Fe<sub>3</sub>O<sub>4</sub>-Au nanoparticles as a multi-function platform for Cd<sup>2+</sup> sensing and nitrocompound catalysis**

Zhaorui Song,<sup>a</sup> Chenrui Jiang,<sup>a</sup> Meriem Fizir,<sup>b</sup> Fangqi Wang,<sup>a</sup> Sijing Ye,<sup>a</sup> Pierre Dramou,<sup>a,\*</sup> Hua He<sup>a, c, d,\*</sup>

<sup>a</sup> Department of Analytical Chemistry, China Pharmaceutical University, Nanjing, 211100, China

<sup>b</sup> Laboratoire de Valorisation des Substances Naturelles, Université Djilali Bounaâma, Khemis-Miliana, Algérie.

<sup>c</sup> Key Laboratory of Biomedical Functional Materials, China Pharmaceutical University, Nanjing 211100, China

<sup>d</sup> Key Laboratory of Drug Quality Control and Pharmacovigilance, Ministry of Education, China Pharmaceutical University, Nanjing 211198, China

\* Corresponding author.

Tel: +86 025 86185008; Fax: +86 025 86185008.

E-mail addresses: jcb\_321@163.com; dochehua@163.com.

## Experimental section

**Chemical and Materials** Ferric chloride ( $\text{FeCl}_3 \cdot 6\text{H}_2\text{O}$ ), Ferrous chloride ( $\text{FeCl}_2 \cdot 4\text{H}_2\text{O}$ ), Chloroauric acid ( $\text{HAuCl}_4 \cdot 4\text{H}_2\text{O}$ ),  $\text{NaBH}_4$ ,  $\text{NaOH}$  were purchased from Sinopharm Chemical Reagent Co., Ltd (China). Cadmium chloride ( $\text{CdCl}_2$ ), 4-nitrophenol (4-NP) were acquired from Macklin Biochemical Co., Ltd (Shanghai, China). L-cysteine (L-cys) and Metronidazole were obtained from Sigma-Aldrich (Shanghai, China). Cyclohexanocucurbit[6]uril ( $\text{CB}^*[6]$ ) and cucurbit[7]uril ( $\text{CB}[7]$ ) were purchased from Shanghai Nafu Biotechnology Co., Ltd (Shanghai, China). All solutions were prepared with distilled water. All chemicals in this work were of analytical grade and used without further purification.

**Characterization** X-Ray diffraction patterns were recorded using a D/MAX-2500PC X-ray diffractometer (Rigaku Corporation) with  $\text{Cu-K}\alpha$  ( $\lambda = 1.5406 \text{ \AA}$ ) radiation and operated at a generator voltage and an emission current of 40 kV and 35 mA. Scan range ( $2\theta$ ) was recorded from  $10^\circ$  to  $80^\circ$  and scan speed was set at  $10^\circ \text{ minute}^{-1}$ . Transmission electron microscopy (TEM) images were obtained on a JEOL JEM 2100F microscope operated at 120 kV operated at an accelerating voltage of 120 kV. Magnetisation measurements was carried out using vibrating sample magnetometer (JC08 HH-15, Bei Xin Ke Yuan Instrument Co., Ltd) under a varying magnetic field from -10000 to 10000 Oe at 300K. Scanning electron microscope (SEM) image and elemental analysis were performed by scanning electron microscope (SEM) equipped with energy-dispersive X-rays (EDX) at 200 kV accelerating voltage (EDAX TEAM<sup>TM</sup>). Particle size was measured with Zetasizer Nano ZS90 (Malvern Instruments, UK).  $\text{Cd}^{2+}$  concentrations were determined using ICP-OES (ICPE-9000, Shimadzu, Japan). UV-vis absorption spectra were acquired with a UV-vis spectrophotometer (UV-1800, Shimadzu, Japan) at room temperature. Infrared (IR) measurements were obtained with a Nicolet Magna 550 spectrometer (Thermo Scientific). The pH was measured with a PHS-3C pH meter (REX, Shanghai, China). Furthermore, molecular modeling calculations are optimized at the B3LYP/6-31G(d) level of density functional theory using the Gaussian 03 program.

### Synthesis of $\text{Fe}_3\text{O}_4\text{-Au@CB}[n]$

This novel multifunctional platform is constructed by three steps, which are the preparation of L-cys functionalized  $\text{Fe}_3\text{O}_4$  NPs,<sup>1</sup> in-situ reduction of  $\text{HAuCl}_4$  and the surface modification of CBs. Due to  $\text{Fe}_3\text{O}_4\text{-cys}$  NPs has abundant functional groups,  $\text{HAuCl}_4$  can be absorbed on the surface of  $\text{Fe}_3\text{O}_4\text{-cys}$  NPs, and then reduct in-situ by  $\text{NaBH}_4$  and get  $\text{Fe}_3\text{O}_4\text{-Au}$  NPs (Acting as **catalyst I**). The outer of  $\text{Fe}_3\text{O}_4\text{-Au}$  NPs with positive charges can bind with the carbonyl-lined portals of CBs by electrostatic adsorption and then finally obtain  $\text{Fe}_3\text{O}_4\text{-Au@CB}^*[6]$  (Acting as **probe I and catalyst II**, respectively) and  $\text{Fe}_3\text{O}_4\text{-Au@CB}[7]$  (Acting as **probe II and catalyst III**, respectively).

**Synthesis of  $\text{Fe}_3\text{O}_4\text{-cys}$  NPs and AuNPs:**  $\text{Fe}_3\text{O}_4$  NPs were prepared by co-precipitation method.<sup>1</sup> For synthesis of L-cys functionalized  $\text{Fe}_3\text{O}_4$  NPs ( $\text{Fe}_3\text{O}_4\text{-cys}$  NPs), 250 mg  $\text{Fe}_3\text{O}_4$

NPs were pretreated with 100 mL HCl solution (1M) under ultrasound for 30 min. Then these Fe<sub>3</sub>O<sub>4</sub> NPs were collected using an external magnet and washed 5 times and then resuspended with 100 mL water. 70 mL L-cys aqueous solution (10 mg mL<sup>-1</sup>) was added into 100 mL Fe<sub>3</sub>O<sub>4</sub> NPs above with ultrasonic treatment for 30 min and then stirred for 3 h at 60 °C. Subsequently, the synthesized Fe<sub>3</sub>O<sub>4</sub>-cys NPs were magnetically separated and washed completely with water, and then resuspended with 100 mL water. As for AuNPs, they were obtained by the reduction reaction of HAuCl<sub>4</sub> (10 mg mL<sup>-1</sup>) in the presence of NaBH<sub>4</sub> (0.1 M) in ice-bath.

**Preparation of Fe<sub>3</sub>O<sub>4</sub>-Au@CB[n]** : Fe<sub>3</sub>O<sub>4</sub>-Au NPs were firstly synthesized. Briefly, 600 μL HAuCl<sub>4</sub> (10 mg mL<sup>-1</sup>) was dispersed in 98 mL water and then mechanically stirred for 10 min at ice bath. Meanwhile, 100 μL Fe<sub>3</sub>O<sub>4</sub>-cys NPs was dispersed in 1.9 mL water with ultrasound for 10 min. A volume of 0.5 mL ice-cold, freshly prepared 0.1 M NaBH<sub>4</sub> was added and then the solution turned wine red immediately. 2 mL Fe<sub>3</sub>O<sub>4</sub>-cys solution was added dropwise and stirred continuously for 2 h at ice bath and then obtained Fe<sub>3</sub>O<sub>4</sub>-Au NPs solution.

The preparation of Fe<sub>3</sub>O<sub>4</sub>-Au@CB\*[6] solution was as follows : 1 mL 2 mg mL<sup>-1</sup> CB\*[6] was added into the fresh prepared Fe<sub>3</sub>O<sub>4</sub>-Au NPs aqueous solution dropwise and the mechanically stirred for 2 h at room temperature. The product was separated magnetically and washed with water for 3 times, and resuspended in 25 mL distilled water.

The preparation of Fe<sub>3</sub>O<sub>4</sub>-Au@CB[7] solution was as follows: 1 mL 2 mg mL<sup>-1</sup> CB[7] was added into the new prepared Fe<sub>3</sub>O<sub>4</sub>-Au NPs aqueous solution and the rest of the process was similar to that of probe I. Ultimately, this solution was dried and a brown magnetic powder was obtained.

#### **Developed probe I for the sensitive detection of Cd<sup>2+</sup>.**

A certain volume of probe I solution was mixed with a series of different concentrations of Cd<sup>2+</sup> solution and the mixtures were mechanically oscillated for 30 min at room temperature, and then UV-vis spectra was recorded. The effect of various parameters like reaction time, pH, probe volume and ion inference were investigated and then a linear relationship between the concentrations of Cd<sup>2+</sup> and the absorbance changes of probe I was expected to be established.

For further practical application, water samples collected from Ming lake (China pharmaceutical university, CPU) with the addition of different concentrations of Cd<sup>2+</sup>, which were used as the simulated samples. After centrifugation at 11000 rpm for 10 min, water samples were filtered through 0.22 μm millipore filter for experimental use. Simulated samples were mixed with probe I for 30 min, and then UV-vis spectra was measured. Meanwhile, the formed nanocomposite precipitation was removed rapidly by a permanent magnet. The fortified concentration and supernatant concentrations of Cd<sup>2+</sup> were detected by ICP-OES.

## Developed heterogeneous catalysts for the catalytic reduction of nitrocompounds

The reduction of 4-nitrophenol (4-NP) with NaBH<sub>4</sub> as the reductant was usually selected as a model reaction. It was used to investigate the catalytic performance of three catalysts. A typical experiment was implemented as follows: 20 μL 4-NP (10 mM), 20 μL catalyst I (1 mg mL<sup>-1</sup>) and 2.8 mL distilled water were added into a cuvette. This solution was treated with ultrasound for 20 s and then 0.2 mL NaBH<sub>4</sub> (0.1 M) was introduced into the mixture with gentle shaking. The color of solution changed from yellow to transparent as the reaction proceeded and the reaction process was monitored by UV-vis spectrum. Meanwhile, Fe<sub>3</sub>O<sub>4</sub>-Au@CB\*[6] NPs and Fe<sub>3</sub>O<sub>4</sub>-Au NPs were also used to be investigated and then compare the differences of catalytic properties. Furthermore, the reusability of these catalysts were also explored under the same conditions above. These catalysts were magnetically separated at the end of each cycle and then washed with distilled water for next time.

The catalytic mechanism of three catalysts were investigated thoroughly. Specifically, the selective catalytic reduction (SCR) of catalyst III to a series of structural analogs of 4-NP including the nitro, carboxyl, amidogen, hydroxyl, aldehyde and carbonyl groups, were also investigated in the same conditions above.

## Results and Discussion

**FT-IR:** FT-IR spectra of Fe<sub>3</sub>O<sub>4</sub> (a), Fe<sub>3</sub>O<sub>4</sub>-cys (b) and Fe<sub>3</sub>O<sub>4</sub>-Au NPs (c) show that all of them have a characteristic of Fe-O absorption peak at 588 cm<sup>-1</sup> due to its symmetric stretching vibration (Fig. S1). Fe<sub>3</sub>O<sub>4</sub>-cys NPs exhibit the characteristic absorption bands of L-cys. 2372 cm<sup>-1</sup> assigns to the S-H stretching vibration. The sharp peak of Fe<sub>3</sub>O<sub>4</sub>-Au NPs at 2372 cm<sup>-1</sup> disappears, implying the formation of Au-S bond. The sharp peak at 1487 cm<sup>-1</sup> disappears, due to electrostatic adsorption between protonated amine (-NH<sub>2</sub>) and surface-bound AuCl<sup>4-</sup>/AuCl<sup>2-</sup> ions.<sup>16</sup>

**XRD:** The XRD patterns of Fe<sub>3</sub>O<sub>4</sub> NPs and Fe<sub>3</sub>O<sub>4</sub>-Au NPs show that Fe<sub>3</sub>O<sub>4</sub>-Au NPs display diffraction peaks at  $2\theta = 38.31^\circ, 44.56^\circ, 64.78^\circ$  and  $77.62^\circ$ , which are assigned to the (111), (200), (220) and (311) planes of gold with a cubic phase (JCPDS card no. 04-0784) (Fig. S2). The absence of Fe<sub>3</sub>O<sub>4</sub> NP diffraction peaks in the XRD pattern of Fe<sub>3</sub>O<sub>4</sub>-Au NPs indicates that the surface of the Fe<sub>3</sub>O<sub>4</sub> NPs has been effectively covered with a layer of AuNPs. Meanwhile, the chemical composition of Fe<sub>3</sub>O<sub>4</sub>-AuNPs was provided by energy dispersive X-ray (EDX) spectroscopy. From Fig. S3, it is clear that these core-shell NPs contain Fe, O and Au elements, and the inset table exhibits the content of the three elements, which distinctly confirms the coexistence of Fe, Au and O. Elemental mapping images reveal that both Fe and O elements with high-density are distributed at the center, and the Au

element is homogeneously distributed, confirming the presence of Au on the surface of Fe<sub>3</sub>O<sub>4</sub> NPs.

**VSM:** The hysteresis loops of Fe<sub>3</sub>O<sub>4</sub> NPs and Fe<sub>3</sub>O<sub>4</sub>-Au NPs are shown in Fig. S6. Fe<sub>3</sub>O<sub>4</sub>-Au NPs have no remanence or coercivity, and the saturation magnetization is 35.6 emu g<sup>-1</sup>, which confirms their good superparamagnetism. Meanwhile, compared with the saturation magnetisation of uncoated Fe<sub>3</sub>O<sub>4</sub> NPs (62.2 emu g<sup>-1</sup>), the decrease of Fe<sub>3</sub>O<sub>4</sub>-Au NPs offers strong evidence that an efficient layer of AuNPs is located outside the magnetic core. The inset pattern also demonstrates the convenient separation of Fe<sub>3</sub>O<sub>4</sub>-Au NPs by an external magnet.

**Selective catalytic reduction (SCR):** From Table S4, we can find that carboxyl, amidogen and hydroxyl groups cannot be reduced by NaBH<sub>4</sub> and catalytic reduction was also not observed even under the combined action of NaBH<sub>4</sub> and catalyst III. The nitro group cannot be reduced by NaBH<sub>4</sub>. However, it can be reduced by NaBH<sub>4</sub> and catalyst III together and the conversion rate can reach up to 97%. The aldehyde group can only be reduced by NaBH<sub>4</sub> or by NaBH<sub>4</sub> and catalyst III together, and all the conversion rates are above 95%. However, the reduction time is the same and the rate constant k values are close to each other, which can be explained by the fact that the aldehyde group can be easily reduced by the strong reductant due to its high reactivity. The carbonyl group can be reduced by NaBH<sub>4</sub> alone and also catalyzed by catalyst III and NaBH<sub>4</sub> together. The reduction reaction can be quickened to some extent with the addition of catalyst III, and the conversion rate is higher than 97%. In conclusion, aldehyde and carbonyl groups can be easily reduced by NaBH<sub>4</sub>, and only nitro groups can be selectively and efficiently reduced under the action of catalyst III.

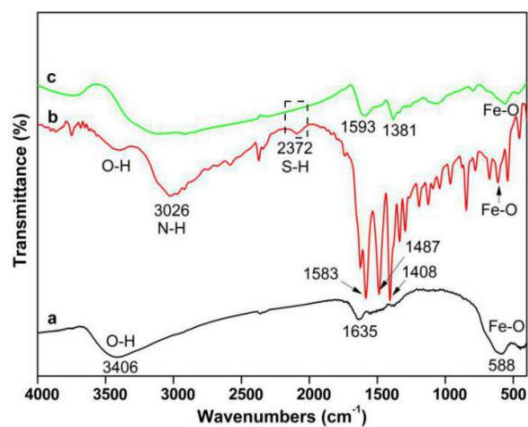

**Fig. S1.** FT-IR spectra of  $\text{Fe}_3\text{O}_4$  (a),  $\text{Fe}_3\text{O}_4$ -cys (b) and  $\text{Fe}_3\text{O}_4$ -Au NPs (c).

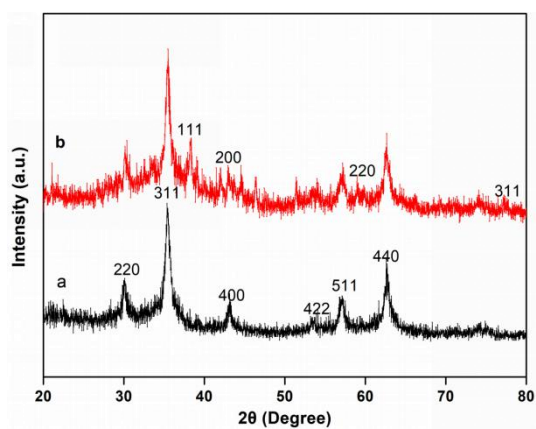

**Fig. S2.** XRD patterns of  $\text{Fe}_3\text{O}_4$  NPs (a) and  $\text{Fe}_3\text{O}_4$ -Au NPs (b).

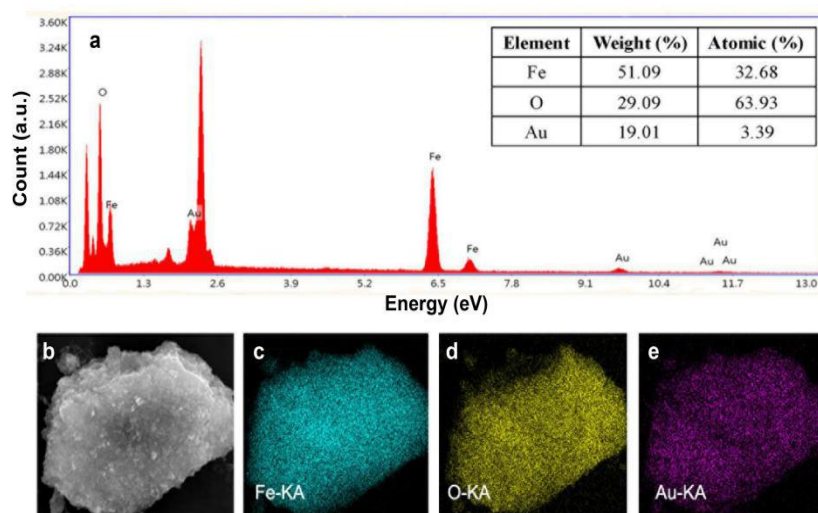

**Fig. S3.** EDX spectra of  $\text{Fe}_3\text{O}_4$ -Au NPs (a); STEM image of  $\text{Fe}_3\text{O}_4$ -Au NPs (b); EDX elemental mapping images (c-e) of  $\text{Fe}_3\text{O}_4$ -Au NPs.

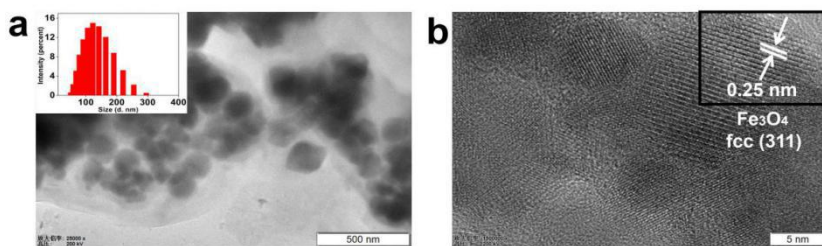

**Fig. S4.** a) TEM and b) HRTEM images of  $\text{Fe}_3\text{O}_4$  NPs.

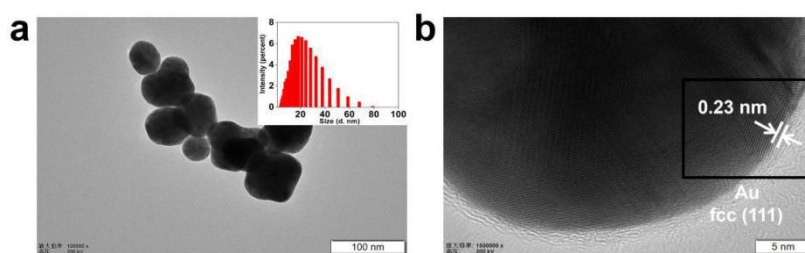

**Fig. S5.** a) TEM and b) HRTEM images of Au NPs.

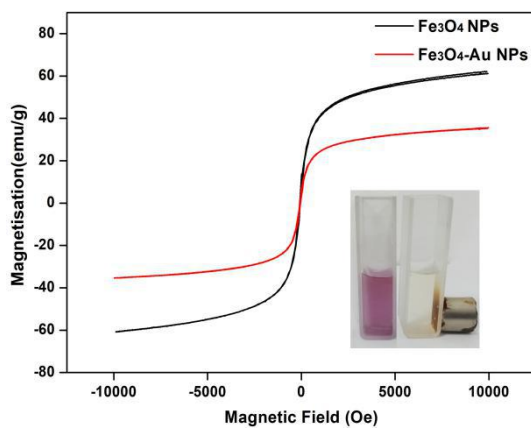

**Fig. S6.** The magnetic hysteresis loops of  $\text{Fe}_3\text{O}_4$  NPs (black) and  $\text{Fe}_3\text{O}_4$ -Au NPs (red).

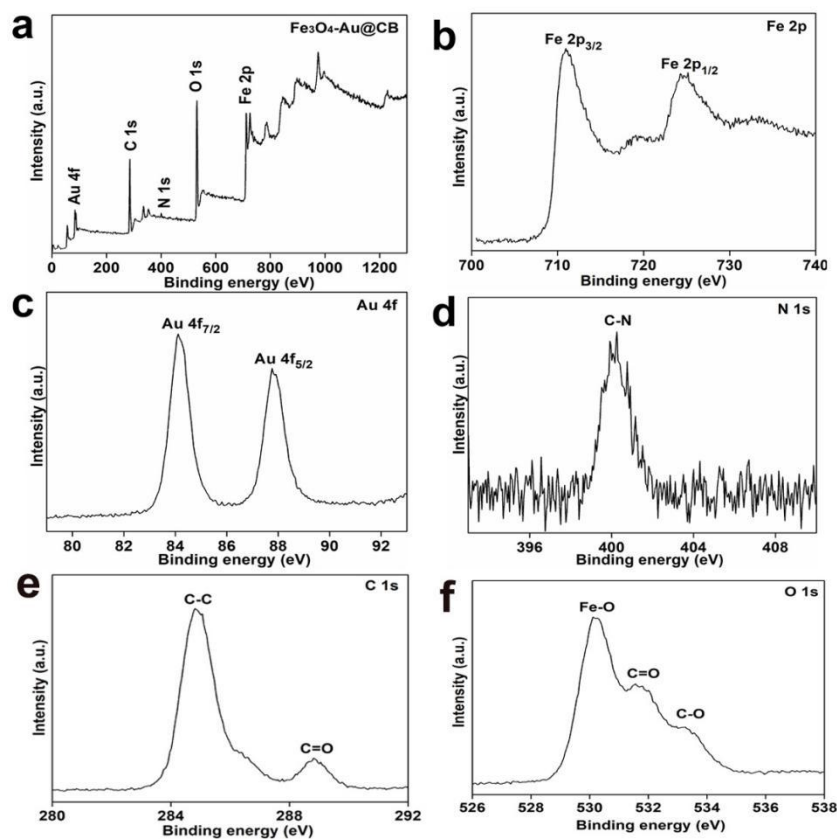

**Fig. S7.** XPS spectra of the as-prepared  $\text{Fe}_3\text{O}_4\text{-Au@CB}$  (CB\*[6] and CB[7]). a) XPS survey spectra. b) Fe 2p spectrum of the  $\text{Fe}_3\text{O}_4\text{-Au@CB}$ . c) Au 4f spectrum of the  $\text{Fe}_3\text{O}_4\text{-Au@CB}$ . d-f) the N 1s, C 1s and O 1s spectrum of  $\text{Fe}_3\text{O}_4\text{-Au@CB}$ .

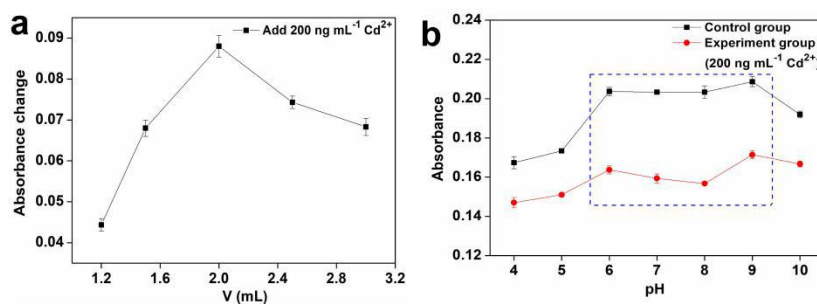

**Fig. S8.** a) The effect of probe I volume on the detection ( $n=3$ ); b) The effect of different pH on the detection ( $n=3$ ).

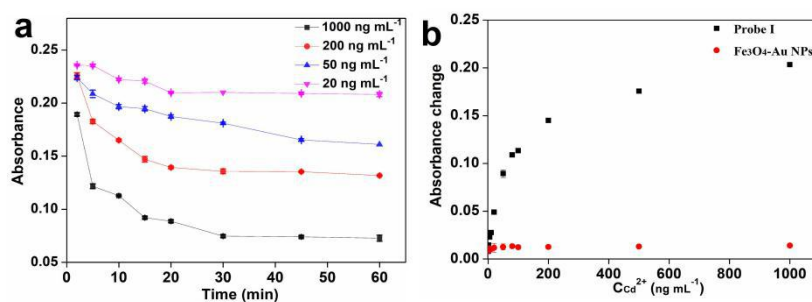



**Fig. S9.** a) Plot of absorbance at 545 nm versus time with the addition of different concentrations of  $\text{Cd}^{2+}$  ( $n=3$ ). b) The absorbance change of probe I and  $\text{Fe}_3\text{O}_4\text{-Au}$  NPs with the addition of different concentrations of  $\text{Cd}^{2+}$  ( $n=3$ ).

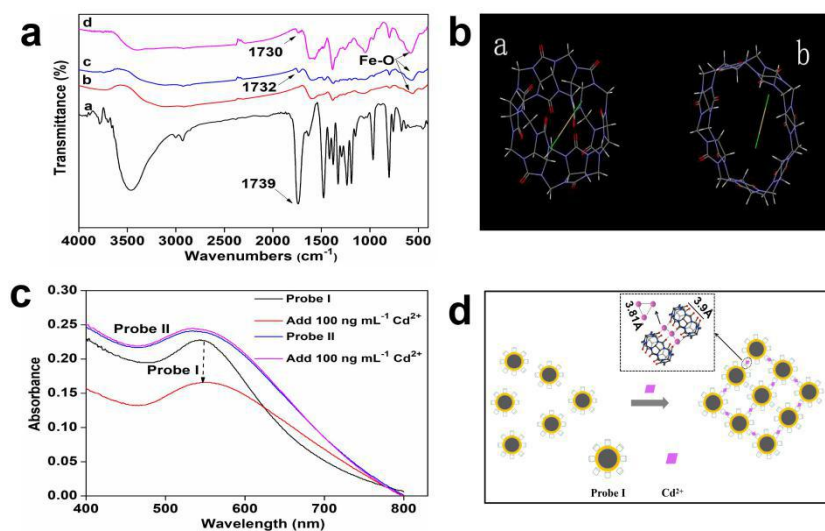

**Fig. S10.** a) FT-IR spectra comparison of  $\text{CB}^*[6]$  (a),  $\text{Fe}_3\text{O}_4\text{-Au}$  NPs (b), probe I (c) and the complex of  $\text{Cd}^{2+}$  binding with probe I (d). b) Molecular modeling of the energy-minimized structure of  $\text{CB}^*[6]\text{-Cd}^{2+}$  complex (a) and  $\text{CB}^*[7]\text{-Cd}^{2+}$  complex (b). c) UV-vis absorption spectra changes of probe I and probe II by adding  $100 \text{ ng mL}^{-1} \text{ Cd}^{2+}$ , respectively. d) Schematic diagram describe the detection principle of  $\text{Cd}^{2+}$  inducing the aggregation of probe I.

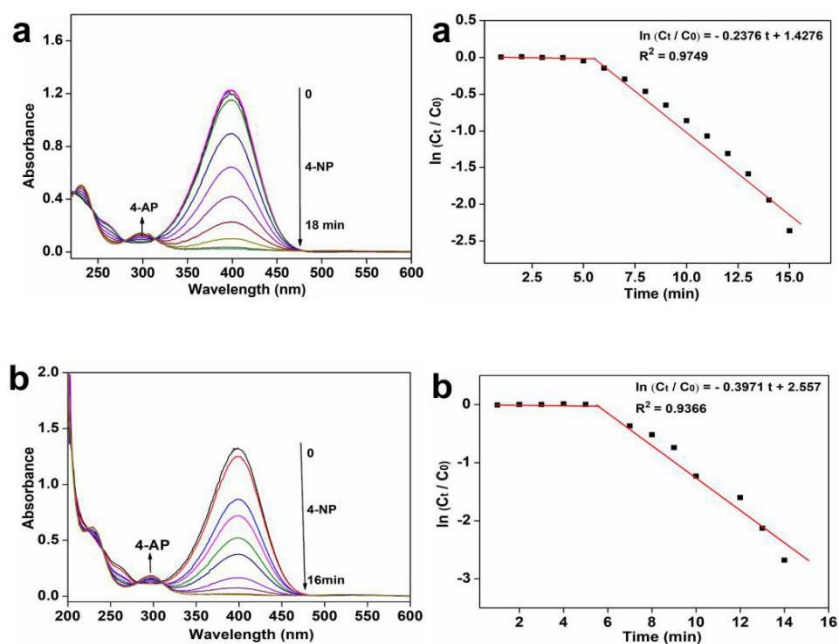

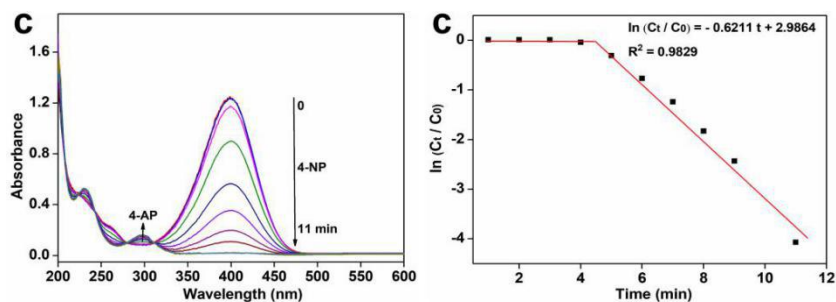

**Fig. S11.** Time - dependent UV- vis spectral changes (left) and the linear relationship of  $\ln(C_t/C_0)$  as a function of time (right) for 4-NP catalyzed by catalyst I (a), II (b) and III (c).

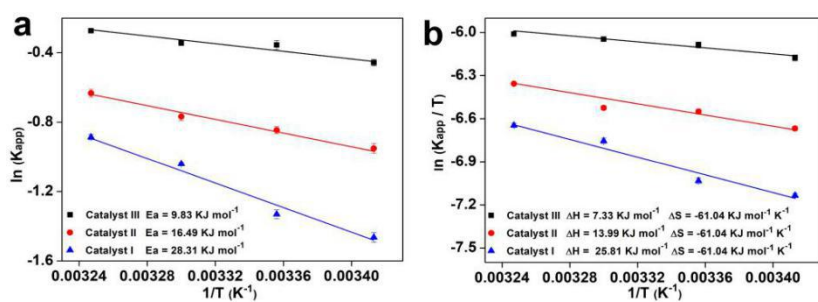

**Fig. S12.** a) Plots of  $\ln k$  (a) and b)  $\ln(k/T)$  versus  $1/T$  for the reduction reaction of 4-NP with three catalysts.

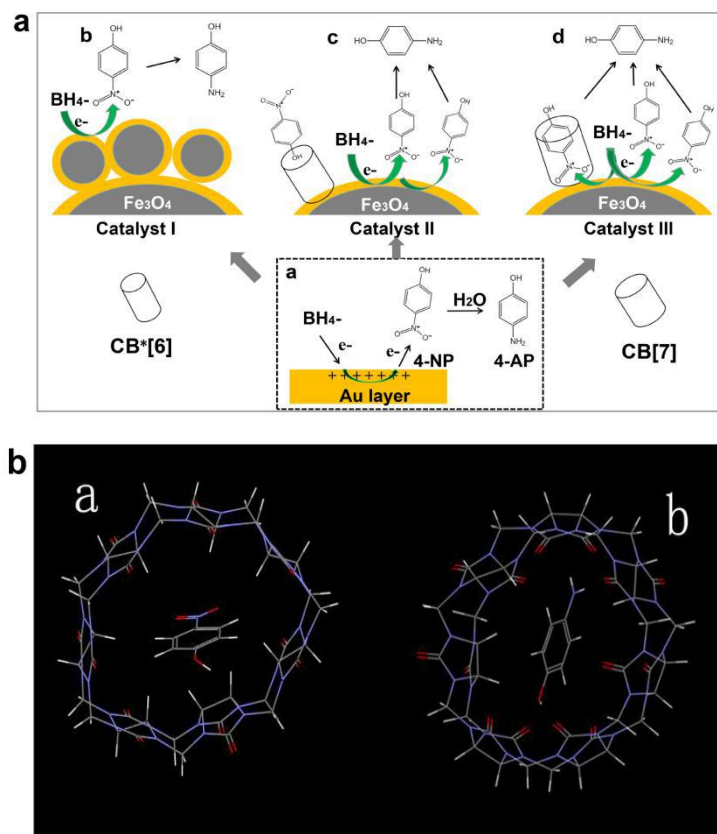

**Fig. S13.** a) Schematic diagram describing catalytic reduction of 4-NP by three catalysts. b) Molecular modeling of the energy-minimized structure of CB[7]-4-NP complex (a) and CB[7]-4-AP complex (b).

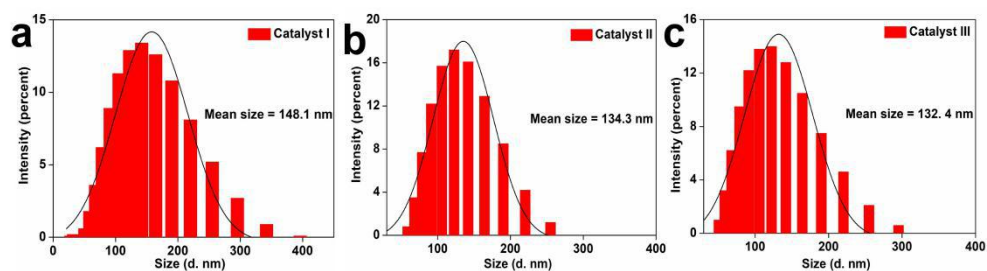

**Fig. S14.** The size distribution of catalyst I (a), catalyst II (b) and catalyst III (c).

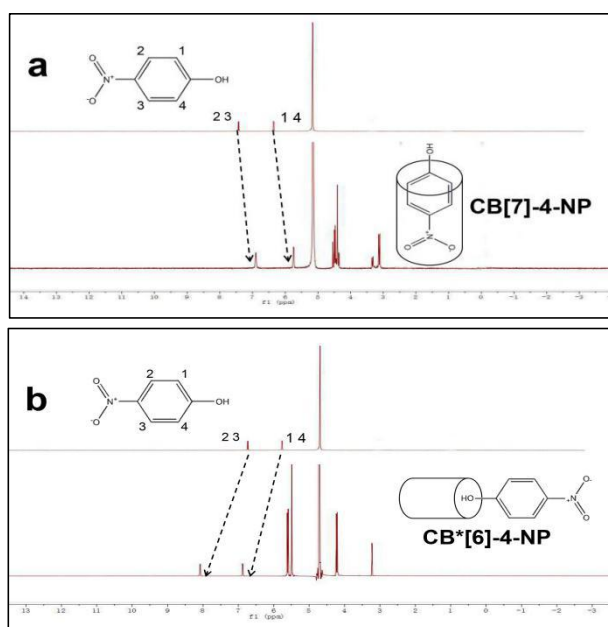

**Fig. S15.** a)  $^1\text{H}$  NMR (600 MHz) spectra of CB[7]-4-NP complex and b) CB\*[6]-4-NP complex.

**Table S1** Determination of  $\text{Cd}^{2+}$  in simulation samples using the proposed method.

| Methods        | Added<br>( $\text{ng mL}^{-1}$ ) | Detected <sup>[a]</sup><br>( $\text{ng mL}^{-1}$ ) | Recovery<br>(%) | CV (%) | <i>p</i> |
|----------------|----------------------------------|----------------------------------------------------|-----------------|--------|----------|
| This<br>method | 5                                | $5 \pm 0.4$                                        | 106.1           | 7.5    | > 0.05   |
|                | 30                               | $30 \pm 3.2$                                       | 101.5           | 10.4   |          |
|                | 70                               | $70 \pm 3.6$                                       | 99.3            | 1.1    |          |
| ICP-OES        | 5                                | $5 \pm 0.2$                                        | 99.5            | 3.1    | > 0.05   |
|                | 30                               | $30 \pm 0.7$                                       | 100.4           | 2.3    |          |
|                | 70                               | $70 \pm 1.1$                                       | 100.3           | 1.6    |          |

[a] Value = mean  $\pm$  SD (n=3)

**Table S2** The kinetic rate constant  $k$  of two catalysts with five consecutive cycles.

| Cycle number              | 1                       | 2                       | 3                       | 4                       | 5                       |
|---------------------------|-------------------------|-------------------------|-------------------------|-------------------------|-------------------------|
| $k_{\text{catalyst III}}$ | $0.62 \text{ min}^{-1}$ | $0.36 \text{ min}^{-1}$ | $0.21 \text{ min}^{-1}$ | $0.10 \text{ min}^{-1}$ | $0.08 \text{ min}^{-1}$ |
| $k_{\text{catalyst I}}$   | $0.24 \text{ min}^{-1}$ | $0.22 \text{ min}^{-1}$ | $0.09 \text{ min}^{-1}$ | $0.05 \text{ min}^{-1}$ | $0.01 \text{ min}^{-1}$ |

**Table S3** Summary of  $\text{Fe}_3\text{O}_4$ -Au catalysts for reduction of 4-NP.

| Catalyst                                                       | Amount (mg) | $k_{\text{app}}$ ( $\text{min}^{-1}$ ) | Reduction time (min) | Recycle number | Ref.      |
|----------------------------------------------------------------|-------------|----------------------------------------|----------------------|----------------|-----------|
| Catalyst III                                                   | 0.05        | 0.62                                   | 11                   | 5              | This work |
| Au- $\text{Fe}_3\text{O}_4$                                    | 2           | 0.63                                   | 10                   | 6              | 21        |
| heterostructures                                               |             |                                        |                      |                |           |
| $\text{Fe}_3\text{O}_4$ @Au NPs                                | 10          | -                                      | 68                   | 6              | 22        |
| Au- $\text{Fe}_3\text{O}_4$ NPs                                | 2           | 0.38-0.63                              | 10                   | -              | 23        |
| $\text{Fe}_3\text{O}_4$ @ $\text{SiO}_2$ @Au@mSiO <sub>2</sub> | 3           | 0.2-0.42                               | 12                   | 7              | 24        |
| rGO- $\text{Fe}_3\text{O}_4$ -Au                               | 4           | 0.686                                  | 5                    | 8              | 25        |

**Table S4** Selective catalytic reduction (SCR) of catalyst III to different functional groups.

| Groups   | Chemical Name                 | Structure                                                                           | Time (min) | $k_{\text{app}}$ <sup>[a]</sup> ( $\text{min}^{-1}$ ) | C <sup>[b]</sup> (%) | Addition         |
|----------|-------------------------------|-------------------------------------------------------------------------------------|------------|-------------------------------------------------------|----------------------|------------------|
| Nitro    | p-Nitrophenol (4-NP)          | 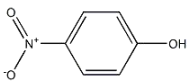 | 7          | 0.621                                                 | 98.46                | 1 <sup>[c]</sup> |
|          |                               |                                                                                     | —          | —                                                     | —                    | 2 <sup>[d]</sup> |
| Carboxyl | Metronidazole                 |  | 10         | 0.482                                                 | 97.05                | 1                |
|          |                               |                                                                                     | —          | —                                                     | —                    | 2                |
|          | Benzoic acid                  |  | —          | —                                                     | —                    | 1                |
|          |                               |                                                                                     | —          | —                                                     | —                    | 2                |
| Amidogen | Terephthalic acid (TPA)       |  | —          | —                                                     | —                    | 1                |
|          |                               |                                                                                     | —          | —                                                     | —                    | 2                |
|          | Para aminobenzoic acid (PABA) |  | —          | —                                                     | —                    | 1                |
| Hydroxyl |                               |                                                                                     | —          | —                                                     | —                    | 2                |
|          | Phenol                        |  | —          | —                                                     | —                    | 1                |
|          |                               |                                                                                     | —          | —                                                     | —                    | 2                |
|          | Salicylic acid                |  | —          | —                                                     | —                    | 1                |
|          |                               |                                                                                     | —          | —                                                     | —                    | 2                |

|          |                              |                                                                                   |    |       |       |       |
|----------|------------------------------|-----------------------------------------------------------------------------------|----|-------|-------|-------|
| Aldehyde | p-hydroxybenzoic acid (PHBA) | 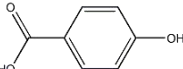 | —  | —     | —     | 1     |
|          |                              |                                                                                   | —  | —     | —     | 2     |
|          | Protocatechualdehyde         |  | 9  | 0.503 | 98.12 | 1     |
|          |                              |                                                                                   |    | 9     | 0.511 | 97.54 |
|          | 4-Dimethylamino benzaldehyde |  | 4  | 0.817 | 95.83 | 1     |
|          |                              |                                                                                   |    | 4     | 0.809 | 96.88 |
| Carbonyl | 4-Aminoacetophenone          |  | 30 | 0.119 | 98.83 | 1     |
|          |                              |                                                                                   | 40 | 0.102 | 97.49 | 2     |

[a] The values of apparent kinetic rate constant. [b] Conversion rate. [c] Adding NaBH<sub>4</sub> and catalyst I. [d] Only adding NaBH<sub>4</sub>.

[1] S. Banerjee, N. P. Kumar, A. Srinivas, S. Roy, *J. Hazard. Mater.*, 2019, **375**, 216-223.
